# Supplementary material for: Combined Transcriptomic Analysis and RNA Interference Reveal the Effects of Methoxyfenozide on Ecdysone Signaling Pathway of Spodoptera exigua
Source: MDPI journal article supplement (doi:10.3390/ijms22169080), 2021-08-23
Supplement: s1 [file s1]

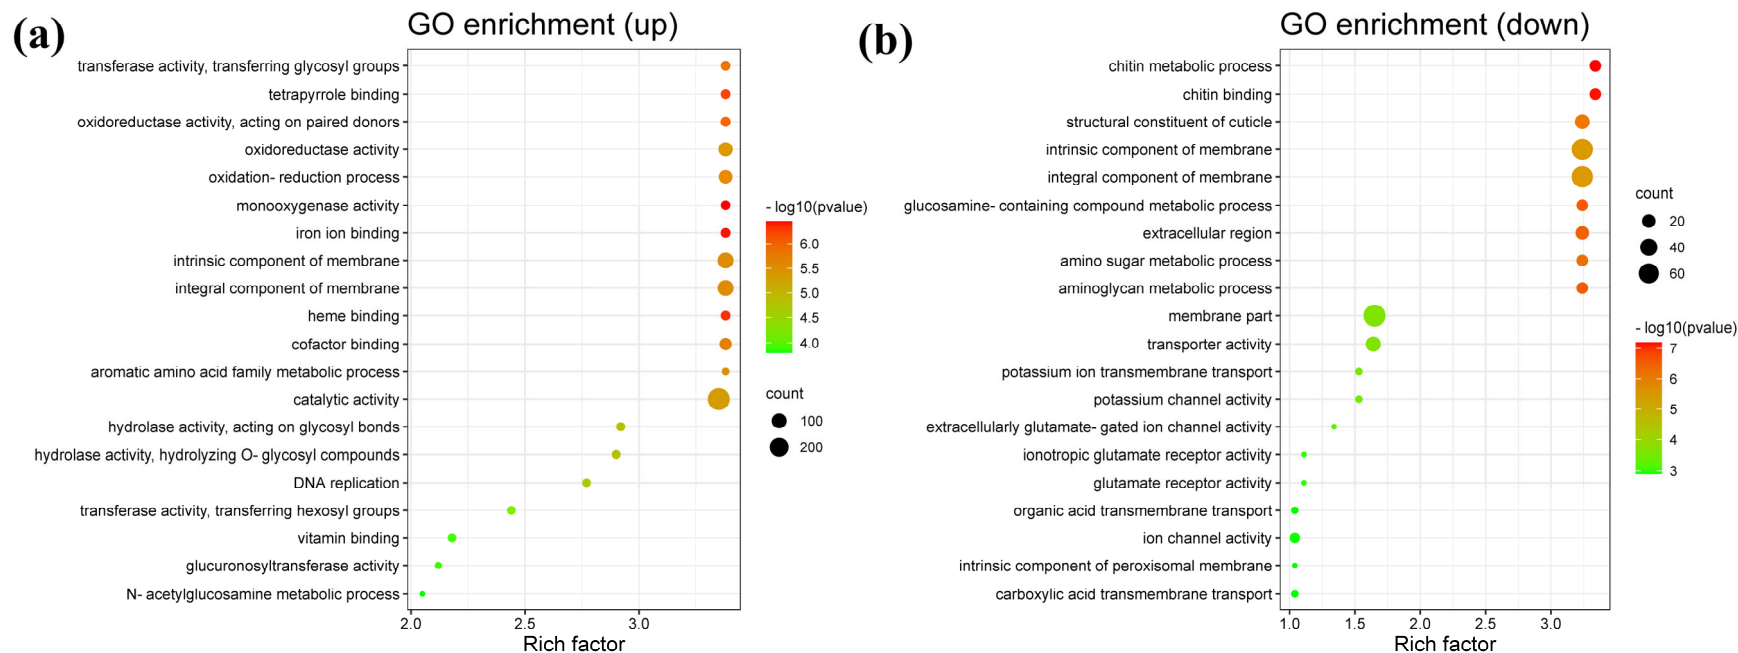

Figure S1. Comparison of up- and down-regulated Gene ontology(GO) enrichment terms of differentially expressed genes (DEGs) of *S. exigua* after exposure of MET.

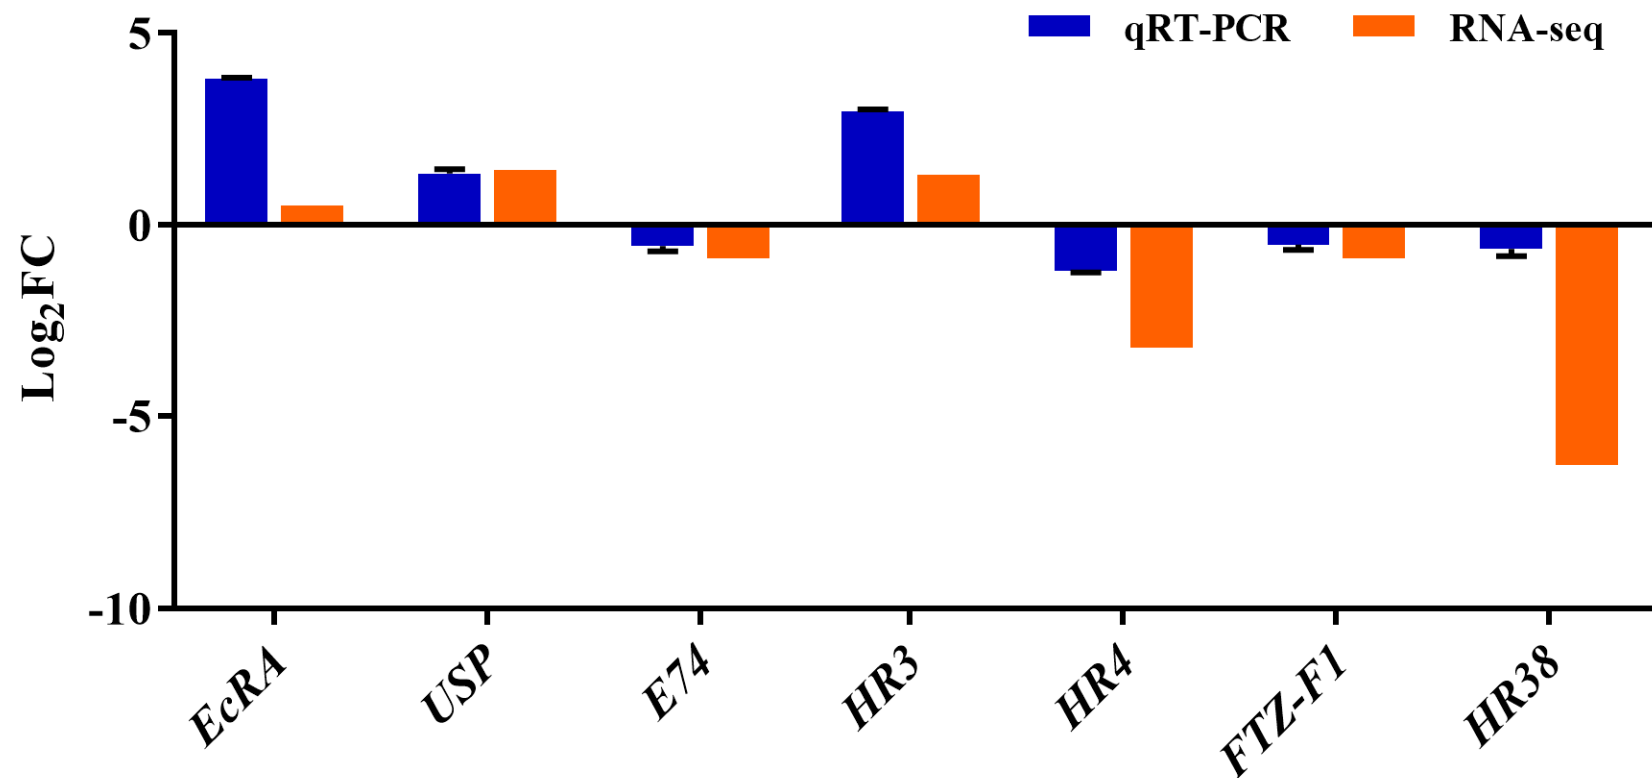

Figure S2. Prove transcriptome data according qPCR (Blue represent transcriptome date, orange represent qPCR). The bars represent the average ( $\pm$ SE) of biological repeats. Expression ratios of 7 candidate genes in log<sub>2</sub>FC (The fold changes of the genes were calculated as the value of each FC comparison and are shown on the y-axis. Blue bars represent gene expression data ( $2^{-\Delta\Delta C_t}$ ) that was obtained by qPCR analysis).

Table S1 Primer designer

| Primer         | Equation            | R <sup>2</sup> | Amplification efficiency | Forward Primer(5'-3')     | Reverse Primer(5'-3')     |
|----------------|---------------------|----------------|--------------------------|---------------------------|---------------------------|
| <i>USP</i>     | $y=-3.3143x+34.567$ | 0.99           | 97%                      | GTAGGTCATTGAACTGTAG       | GACACCTACCTGACGATTA       |
| <i>HR3</i>     | $y=-3.3269x+32.564$ | 0.99           | 95%                      | GGTGATATAAGCAAGGTC        | GTAGGTCATTGAACTGTAG       |
| <i>EcRA</i>    | $y=-3.3593x+33.527$ | 0.99           | 98%                      | GGAGCTATGTCTCGTCTG        | AATCCTTTACACCCTTCACA      |
| <i>FTZ-F1</i>  | $y=-3.2212x+37.386$ | 0.99           | 104%                     | AACACAACGGAAGCGCTGCC      | GGTGACGACTCTGGCGATGA      |
| <i>HR4</i>     | $y=-3.3597x+36.638$ | 0.98           | 98%                      | AGATACCAGCACGTCGTCGC      | GATGGCAAGCAGGCGATGGT      |
| <i>HR38</i>    | $y=-3.3765x+32.309$ | 0.98           | 98%                      | AATGGACGAAGACTGCTA        | ATGGAAGGTTGATGATATTGAT    |
| <i>E74</i>     | $y=-3.3888x+31.016$ | 0.99           | 97%                      | CACTGTTTCCTGGTTGTTGC      | AGTCAGCAACAGCAACAACA      |
| <i>TPS</i>     | $y=-3.4958x+32.035$ | 0.99           | 93%                      | CGCTACACTTGAGTTGAA        | ATTGGATGCTATTGAGGTT       |
| <i>TREA</i>    | $y=-3.4174x+30.393$ | 0.98           | 96%                      | ATTGGTGATTGGTAGTAAGT      | GAAGCAGGTGGTATTATCA       |
| <i>HK</i>      | $y=-3.3729x+34.474$ | 0.99           | 98%                      | TTCTCTTGATTCTTCCAT        | CACACGCTCTTATTATAG        |
| <i>G6PI</i>    | $y=-3.3048x+34.424$ | 0.98           | 101%                     | TACCTGACTTCTCTAACT        | ATCTTACTAGCCAACCTC        |
| <i>GFAT</i>    | $y=-3.3493x+30.497$ | 0.99           | 99%                      | TCCATTGACATTCCATTA        | ACTTATTGACATACGGTAA       |
| <i>PGM</i>     | $y=-3.2192x+31.904$ | 0.99           | 104%                     | GGACTGAAGATATTGTTAGAG     | GAATACTGCTTGACATACTT      |
| <i>UAP</i>     | $y=-3.3597x+34.668$ | 0.98           | 98%                      | GGTGGTATTGTAGAAGAC        | GGACTAATTGTGAAGACT        |
| <i>CHSA</i>    | $y=-3.3915x+33.309$ | 0.98           | 97%                      | CGCTCATACAGTTCTATA        | CTTCATTCAACATCCATT        |
| <i>SeGAPDH</i> | -                   | -              | -                        | GACAACCACTCATCTATCTTCG    | AACATTTATCTCTACAACGCAATC  |
| <i>SeEF</i>    | -                   | -              | -                        | TGATGCCACAGACAAGAG        | CCATTTCCACAAGTTCTACC      |
| <i>dsEcRA</i>  | -                   | -              | -                        | ggatcctaatacgactcactatagg | ggatcctaatacgactcactatagg |
|                | -                   | -              | -                        | GTGTCGGTTGAAGAAATGTCT     | CGCAACATCATCACCTCACT      |
| <i>dsGFP</i>   | -                   | -              | -                        | ggatcctaatacgactcactatagg | ggatcctaatacgactcactatagg |
|                | -                   | -              | -                        | AAGGGCGAGGAGCTGTTACCG     | CAGCAGGACCATGTGATCGCGC    |
